# Supplementary material for: Sonochemical formation of iron oxide nanoparticles in ionic liquids for magnetic liquid marble
Source: Royal Society of Chemistry journal article supplement (doi:10.1039/c2cp23675c), 2012-01-01
Supplement: c2cp23675c.pdf [file c2cp23675c.pdf]

# Sonochemical Formation of Iron Oxide Nanoparticles in Ionic Liquids for Magnetic Liquid Marble

Shiguo Zhang, Yan Zhang, Ying Wang, Shimin Liu and Youquan Deng\*

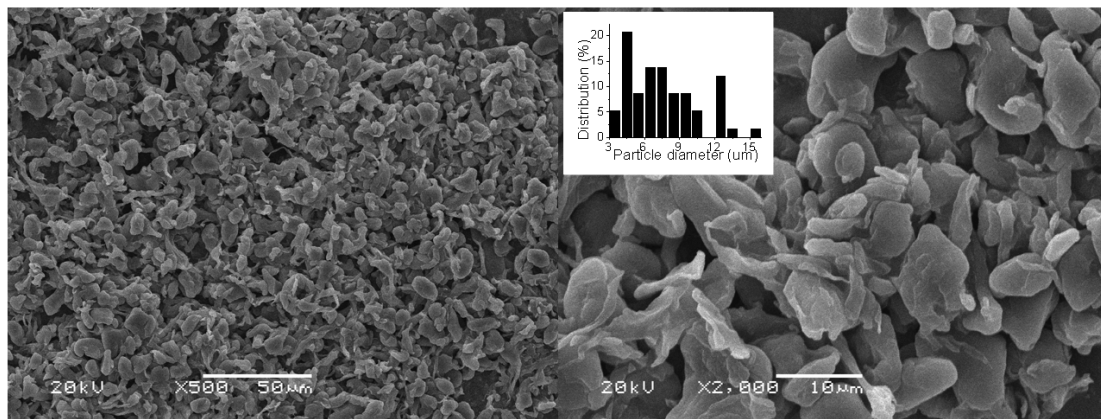

**Fig. S1** SEM microscopy of PTFE particles (inset is the particle size distribution histogram).

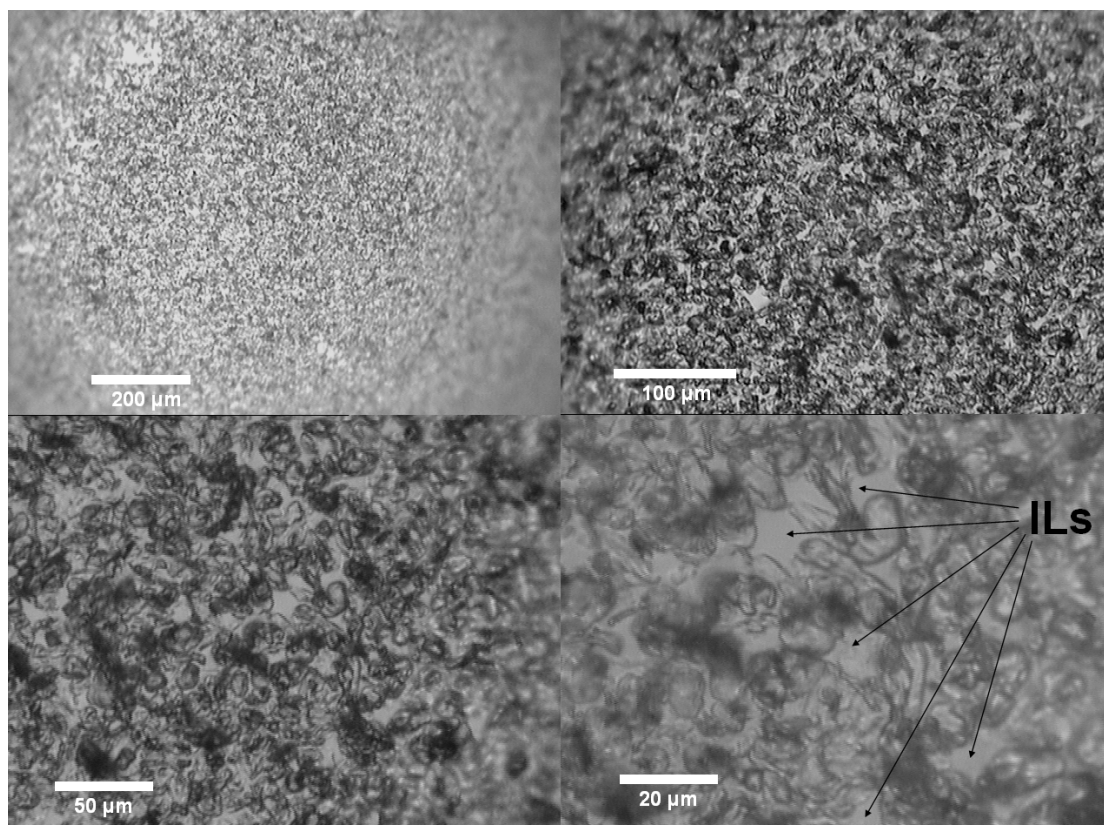

**Fig. S2** Surface of an ionic liquid marble coated with PTFE particles, as seen with a microscope.
